# Supplementary material for: River–Groundwater Interaction and Recharge Effects on Microplastics Contamination of Groundwater in Confined Alluvial Aquifers
Source: MDPI journal article supplement (doi:10.3390/w14121913), 2022-06-14
Supplement: s1 [file s1]

Archive with 1 entries (1 files):
- water-1744321-supplementary.pdf
